# Supplementary material
Source: MDPI journal article supplement (https://www.mdpi.com/2311-5629/10/1/27)
Supplement: s1 [file s1]

Archive with 1 entries (1 files):
- carbon-2880784-supplementary.pdf
